# Supplementary material for: Highly efficient supported catalysts based on Zr-containing polyoxometalates and multiwalled carbon nanotubes for selective oxidation of thioethers with H2O2
Source: Royal Society of Chemistry journal article supplement (doi:10.1039/d4cy01526f), 2025-01-01
Supplement: d4cy01526f1.pdf [file d4cy01526f1.pdf]

## Supplementary Information

### **Highly efficient supported catalysts based on Zr-containing polyoxometalates and multiwalled carbon nanotubes for selective oxidation of thioethers with H<sub>2</sub>O<sub>2</sub>**

Vladimir A. Lopatkin,<sup>a</sup> Vasilii Yu. Evtushok,<sup>a\*</sup> Olga A. Stonkus,<sup>a</sup> Lidiya S. Kibis,<sup>a</sup>  
Olga Yu. Podyacheva,<sup>a</sup> and Oxana A. Kholdeeva,<sup>a\*</sup>

Boreskov Institute of Catalysis, Pr. Lavrentieva 5, Novosibirsk 630090, Russia

## Table of Contents

|                                                                                                                                                                   |        |
|-------------------------------------------------------------------------------------------------------------------------------------------------------------------|--------|
| <b>POM Synthesis and Characterization</b>                                                                                                                         | p. S3  |
| <b>Additional characterization data, kinetic curves and comparison tables</b>                                                                                     | p. S5  |
| Figure S1. TGA curves for N-CNT support and representative supported $PW_{11}Zr$ catalysts.                                                                       | p. S5  |
| Figure S2. Adsorption isotherms for $PW_{11}Zr$ , $ZrW_5$ and $P_2W_{17}Zr$ adsorption on N-CNT using $H^+$ as immobilizing agent.                                | p. S6  |
| Figure S3. XPS survey spectra of TBA-salt $PW_{11}Zr$ , N-CNT, and $PW_{11}Zr/Zn$ -N-CNT.                                                                         | p. S6  |
| Figure S4. C 1s XPS spectra of N-CNT and $PW_{11}Zr/Zn$ -N-CNT. N 1s XPS spectra of $PW_{11}Zr/Zn$ -N-CNT, N-CNT, difference spectrum, and TBA-salt $PW_{11}Zr$ . | p. S7  |
| Figure S5. W 4f and Zr 3d XPS spectra of TBA-salt $PW_{11}Zr$ and $PW_{11}Zr/Zn$ -N-CNT.                                                                          | p. S7  |
| Figure S6. FT-IR spectra of TBA-salt of $P_2W_{17}Zr$ and corresponding heterogenous catalyst 10% $P_2W_{17}Zr/Zn$ -N-CNT.                                        | p. S8  |
| Figure S7. HAADF-STEM and HRTEM images of 14% $PW_{11}Zr/Zn$ -CNT.                                                                                                | p. S8  |
| Figure S8. Effects of the support and immobilizing agent nature on the rate of MPS oxidation with 30% $H_2O_2$ over immobilized $PW_{11}Zr$ catalysts.            | p. S9  |
| Figure S9. Kinetic curves for MPS oxidation with 30% aqueous $H_2O_2$ over $PW_{11}Zr/N$ -CNT catalysts with varied $PW_{11}Zr$ content.                          | p. S9  |
| Figure S10. Kinetic curves of MPS oxidation with 30% aqueous $H_2O_2$ in the presence of 18 wt.% $PW_{11}Zr/Zn$ -N-CNT or homogeneous $PW_{11}Zr$ catalyst.       | p. S10 |
| Figure S11. Kinetic curve for omeprazole sulfide oxidation with 30% aqueous $H_2O_2$ over 18% $PW_{11}Zr/N$ -CNT catalyst.                                        | p. S10 |
| Figure S12. Hot filtration test for MPS oxidation with 30% aq. $H_2O_2$ over 18 wt.% $PW_{11}Zr/Zn$ -N-CNT in ethanol.                                            | p. S11 |
| Figure S13. Hot filtration test for MPS oxidation with 30% aq. $H_2O_2$ over 10 wt.% $P_2W_{17}Zr/Zn$ -N-CNT in ethanol.                                          | p. S11 |
| Figure S14. Hot filtration test for MPS oxidation with 30% aq. $H_2O_2$ over 10 wt.% $PW_{11}Ti/Zn$ -N-CNT in ethanol.                                            | p. S12 |
| Table S1. Comparison of Zr-POM content in Zr-POM/(N)-CNT based on TGA and UV-vis.                                                                                 | p. S13 |
| Table S2. Textural data for CNT and N-CNT supports and representative supported Zr-POM catalysts.                                                                 | p. S13 |
| Table S3. Elemental composition of TBA-salt $PW_{11}Zr$ , N-CNT support and $PW_{11}Zr/Zn$ -N-CNT catalyst based on XPS data.                                     | p. S14 |
| Table S4. Blank experiments and effect of $Zn(NO_3)_2$ additives on catalytic performance.                                                                        | p. S14 |
| Table S5. Comparison of catalytic performance of various heterogeneous catalysts for selective oxidation of MPS with 30% $H_2O_2$ .                               | p. S15 |
| <b>References</b>                                                                                                                                                 | p. S16 |

## POM Synthesis and Characterization

The synthesis of  $(\text{Bu}_4\text{N})_6[\{\text{W}_5\text{O}_{18}\text{Zr}(\mu\text{-OH})\}_2]$  ( $\text{ZrW}_5$ ) was carried out as described previously [S1]. Anal. Calcd. (%) for  $\text{C}_{96}\text{H}_{218}\text{N}_6\text{Zr}_2\text{W}_{10}\text{O}_{38}$ : C, 28.20; H, 5.33; N, 2.06; Zr 4.47; W, 44.99. Found: C, 27.70; H, 5.57; N, 2.02; Zr, 4.58; W, 43.7. IR (KBr, 1000–400  $\text{cm}^{-1}$ ): 970 (sh, W=O), 945 (s, W=O), 881 (m), 812 (br, WOW), 731 (s, ZrOH), 645 (m), 625 (m), 557 (m), 430 (s), 419 (sh).  $^{183}\text{W}$  NMR (ppm, in  $\text{CD}_3\text{CN}$ ): 50.8 ( $4W_{\text{eq}}$ ), 78.2 ( $1W_{\text{ax}}$ ).

The synthesis of  $(\text{Bu}_4\text{N})_8[\{\text{PW}_{11}\text{O}_{39}\text{Zr}(\mu\text{-OH})\}_2]$  ( $\text{PW}_{11}\text{Zr}$ ) was adapted from ref. [S2] as described in [S3]. Anal. Calcd. (%) for  $\text{C}_{128}\text{H}_{294}\text{N}_8\text{P}_2\text{Zr}_2\text{W}_{22}\text{O}_{82}$ : C, 20.37; H, 3.90; N, 1.48; Zr, 2.42; W, 53.59. Found: C, 20.20; H, 3.85; N, 1.5; Zr, 2.33; W, 53.3. IR (1100–400  $\text{cm}^{-1}$ ): 1064, 965, 890, 807, 768 (ZrOZr), 685, 595, 514.  $^{183}\text{W}$  NMR (ppm, 0.02 M in  $\text{CD}_3\text{CN}$ ):  $\delta$  -91.6 (2), -92.6 (2), -96.3 (1), -102.5 (2), -115.5 (2), -119.1 (2).  $^{31}\text{P}$  NMR (ppm, 0.01 M in  $\text{CH}_3\text{CN}$ ):  $\delta$  -12.22. Potentiometric titration with  $\text{Bu}_4\text{NOH}$  (0.77 M in  $\text{CH}_3\text{OH}$ ) revealed one acid proton per POM molecule, which is in agreement with the literature [S4].

The synthesis of  $(\text{Bu}_4\text{N})_{11}\text{H}_3[\{\text{P}_2\text{W}_{17}\text{O}_{61}\text{Zr}\}_2(\mu\text{-OH})_2]$  ( $\text{P}_2\text{W}_{17}\text{Zr}$ ) was adapted from the literature [S5]. The lacunary precursor  $\text{K}_{10}[\alpha_2\text{-P}_2\text{W}_{17}\text{O}_{61}]$  was prepared following the literature protocol [S6].  $\text{ZrOCl}_2 \cdot 8\text{H}_2\text{O}$  (135.5 mg, 0.419 mmol) was dissolved in 24.1 mL of water. Then  $\text{K}_{10}[\alpha_2\text{-P}_2\text{W}_{17}\text{O}_{61}]$  (2.0 g, 0.4 mmol) of was added, and the mixture was stirred for 15 min. Next, the pH of the solution was adjusted to 2.5 using 1 M HCl, and the reaction mixture was stirred for 30 min at 90 °C. After cooling to room temperature, 1880 mg of  $\text{Bu}_4\text{NBr}$  (5.838 mmol) was added, and the resulting white solid was separated by filtration, washed two times with water and then with ice ethanol, dried overnight at room temperature, and then dried at 60 °C under dynamic vacuum. The yield of thus obtained  $\text{Bu}_4\text{N}$ -salt of  $\text{P}_2\text{W}_{17}\text{Zr}$  was 1.8 g. Anal. Calcd. for  $\text{C}_{176}\text{H}_{401}\text{N}_{11}\text{Zr}_2\text{P}_4\text{W}_{34}\text{O}_{126}$ : C, 18.8; H, 3.6; N, 1.4; Found: C, 18.7; H, 3.4; N, 1.4. IR (1200–400,  $\text{cm}^{-1}$ ): 1149, 1089, 1017, 955, 910, 790, 598, 562, 526, 467.  $^{31}\text{P}$  NMR (ppm, 0.02 M in  $\text{CH}_3\text{CN}$  at 20 °C):  $\delta$  -10.70, -13.27.

The synthesis of **(Bu<sub>4</sub>N)<sub>7</sub>[(PW<sub>11</sub>TiO<sub>39</sub>)<sub>2</sub>OH]** (**PW<sub>11</sub>Ti**) was carried out following the literature protocol [S7]. The number of Bu<sub>4</sub>N cations determined by the ignition at 600 °C was ca. 3.5 per P atom. Anal. Calcd. for C<sub>112</sub>H<sub>253</sub>N<sub>7</sub>O<sub>79</sub>P<sub>2</sub>Ti<sub>2</sub>W<sub>22</sub>: C, 18.78; H, 3.56; N, 1.37; O, 17.64; P, 0.86; Ti, 1.34; W, 56.45. Found: C, 19.11; H, 3.58; N, 1.37; P, 0.66; Ti, 1.16; W, 56.33. IR (1200–400, cm<sup>-1</sup>): δ 1076, 971, 891, 815, 655, 594, 515. <sup>31</sup>P NMR (ppm, in dry CH<sub>3</sub>CN at 20 °C): δ -12.76. <sup>183</sup>W NMR, (ppm, in CH<sub>3</sub>CN at 20 °C): δ -89.5 (2), -98.5 (2), -99.2 (1), -101.5 (2), -105.4 (2), -108.7 (2).

The synthesis of **(Bu<sub>4</sub>N)<sub>3</sub>[W<sub>5</sub>O<sub>18</sub>Ti(OCH<sub>3</sub>)]** (**Ti-L**) was carried out following the literature protocol [S8]. IR (1200–400, cm<sup>-1</sup>): δ 1150, 1105, 1055, 1025, 1007, 969, 950, 886, 802, 738, 619, 598, 577, 540, 445. <sup>183</sup>W NMR, (ppm, in CD<sub>3</sub>CN at 20 °C): δ -42.6 (4W<sub>eq</sub>), -74.5 (1W<sub>ax</sub>).

### Additional characterization data, kinetic curves and comparison tables

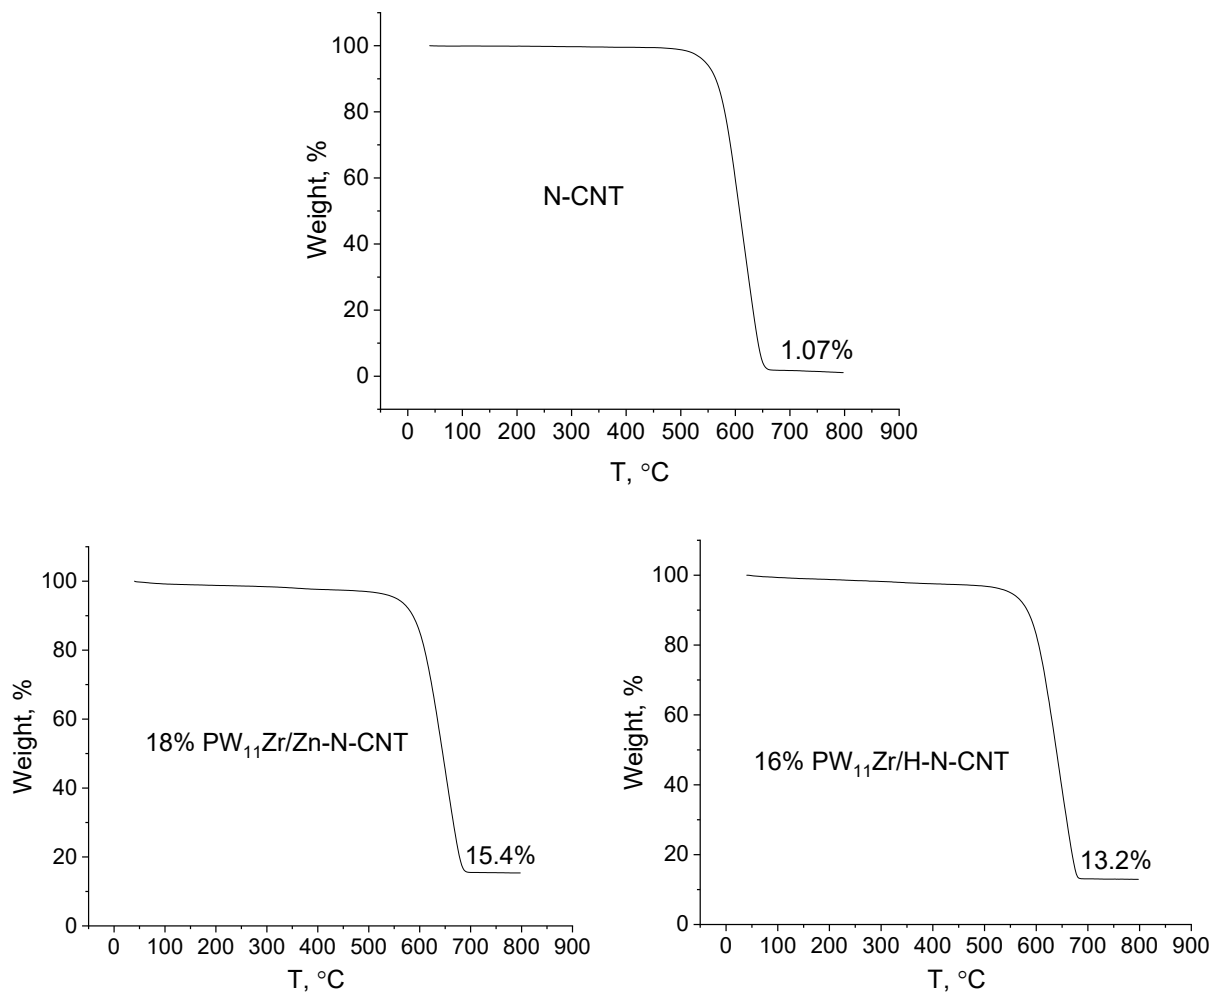

Figure S1. TGA curves for N-CNT support (upper panel) and representative supported PW<sub>11</sub>Zr catalysts (lower panel).

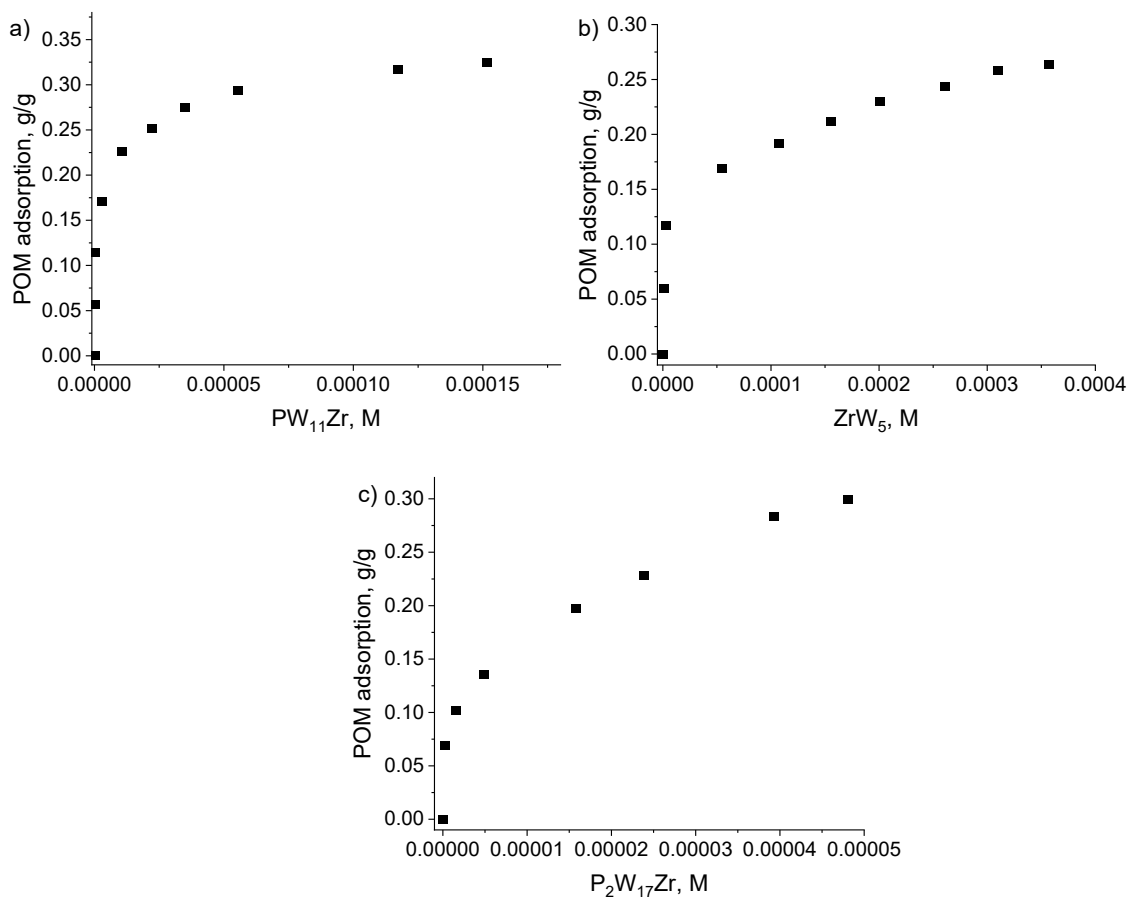

Figure S2. Adsorption isotherms for a) PW<sub>11</sub>Zr, b) ZrW<sub>5</sub> and c) P<sub>2</sub>W<sub>17</sub>Zr adsorption on N-CNT using H<sup>+</sup> as immobilizing agent.

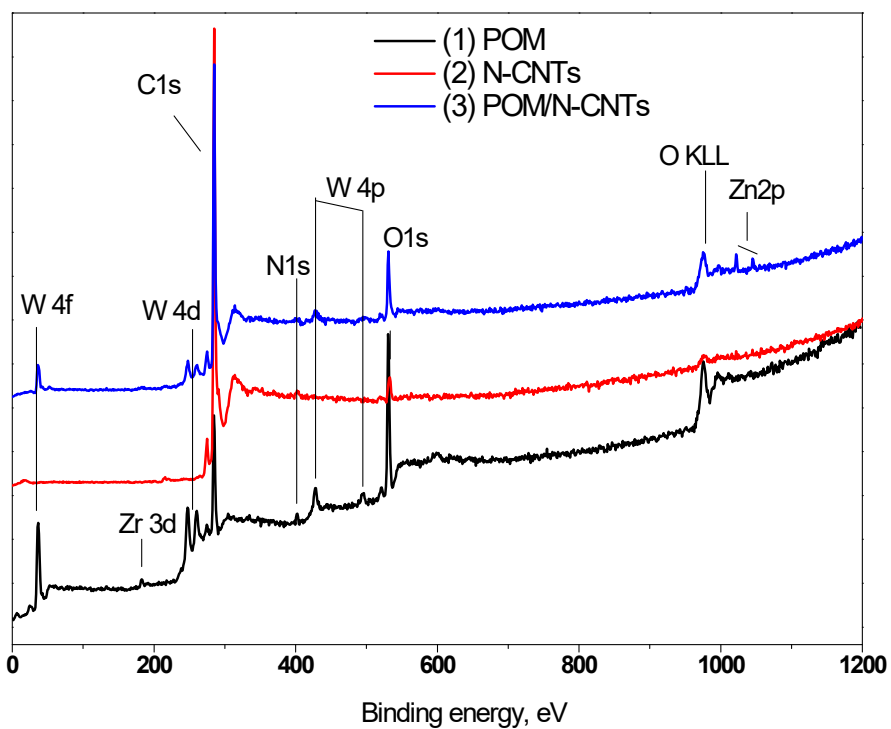

Figure S3. XPS survey spectra of: (1) TBA-salt PW<sub>11</sub>Zr, (2) N-CNT, and (3) PW<sub>11</sub>Zr/Zn-N-CNT.

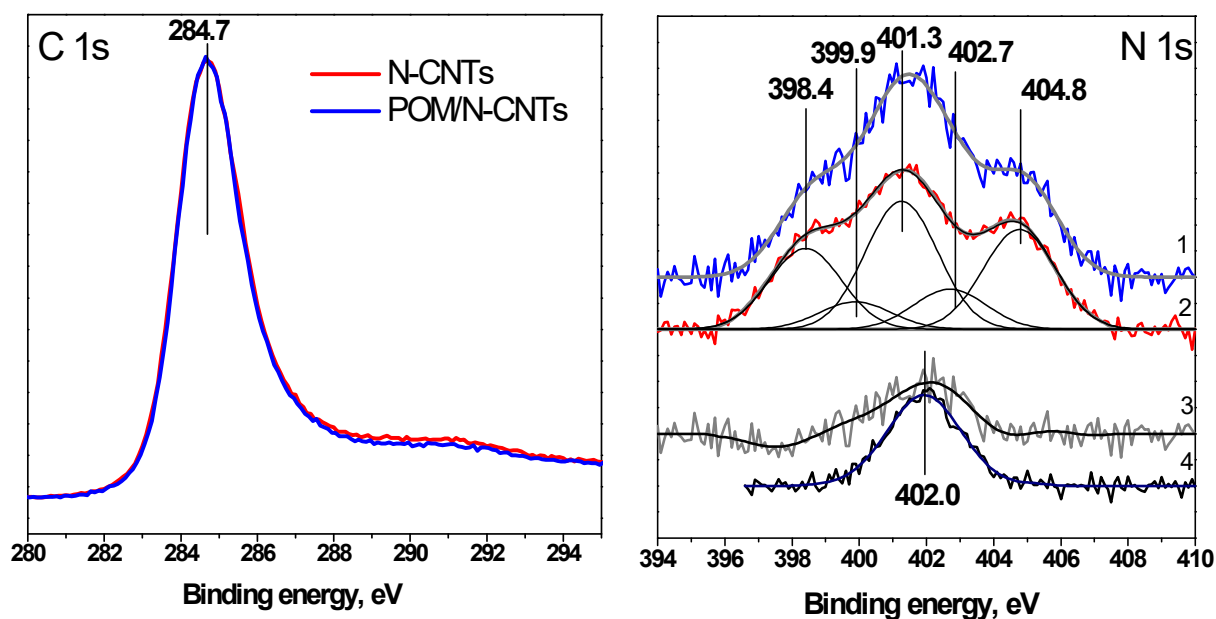

Figure S4. a) C 1s XPS spectra of N-CNT and  $PW_{11}Zr/Zn$ -N-CNT. b) N 1s XPS spectra of (1)  $PW_{11}Zr/Zn$ -N-CNT, (2) N-CNT, (3) difference spectrum obtained by subtracting the spectra of samples (1) and (2), and (4) TBA-salt  $PW_{11}Zr$ .

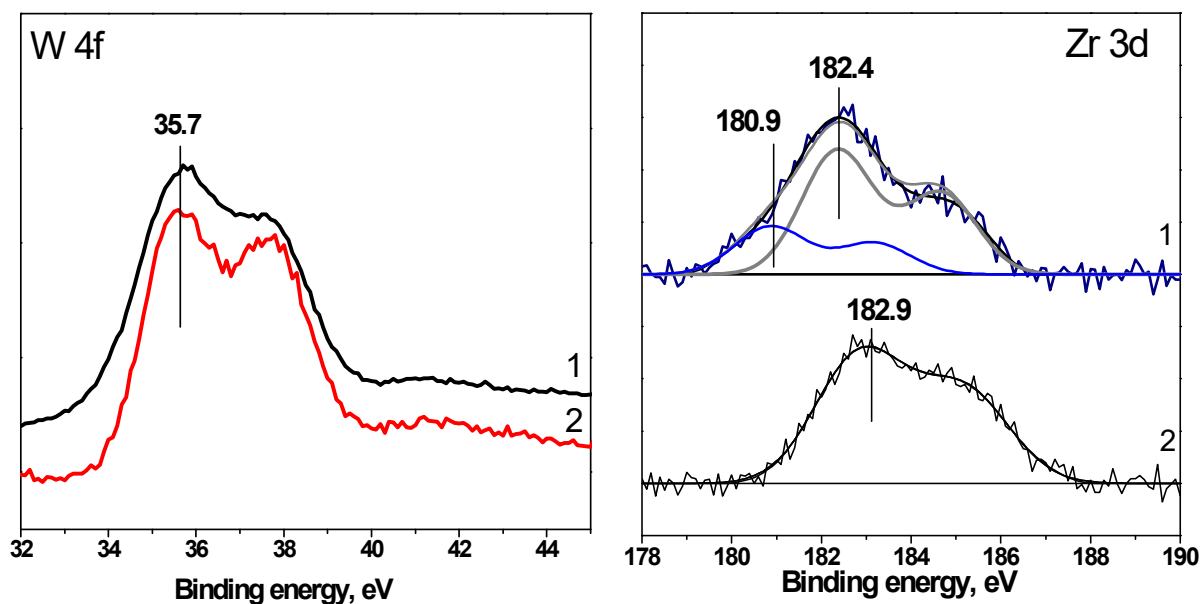

Figure S5. W 4f and Zr 3d XPS spectra of (1) TBA-salt  $PW_{11}Zr$  and (2)  $PW_{11}Zr/Zn$ -N-CNT.

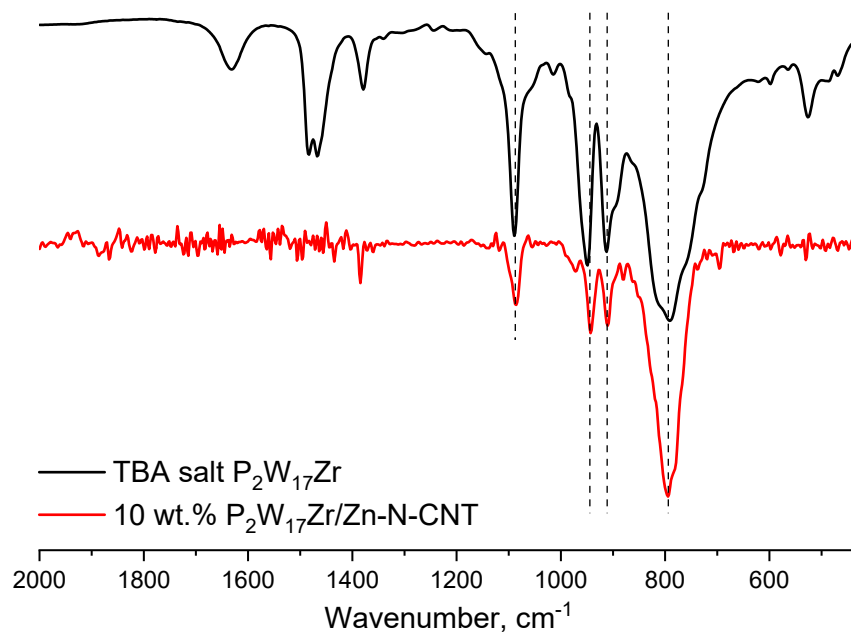

Figure S6. FT-IR spectra of TBA-salt of  $P_2W_{17}Zr$  Zr-POMs and corresponding heterogenous catalyst 10%  $P_2W_{17}Zr/Zn-N-CNT$ .

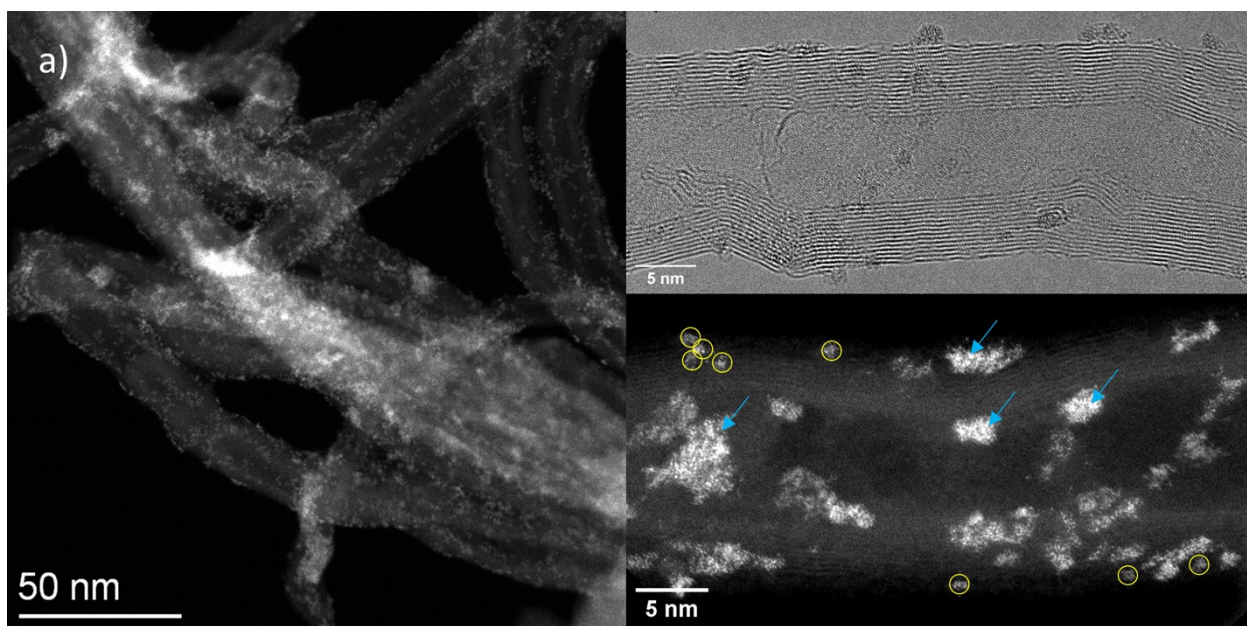

Figure S7. HAADF-STEM and HRTEM images of 14%  $PW_{11}Zr/Zn-CNT$ . In the high-resolution HAADF-STEM images, yellow circles indicate individual Zr-POM particles, blue arrows indicate agglomerates of Zr-POM particles formed under the action of the electron beam.



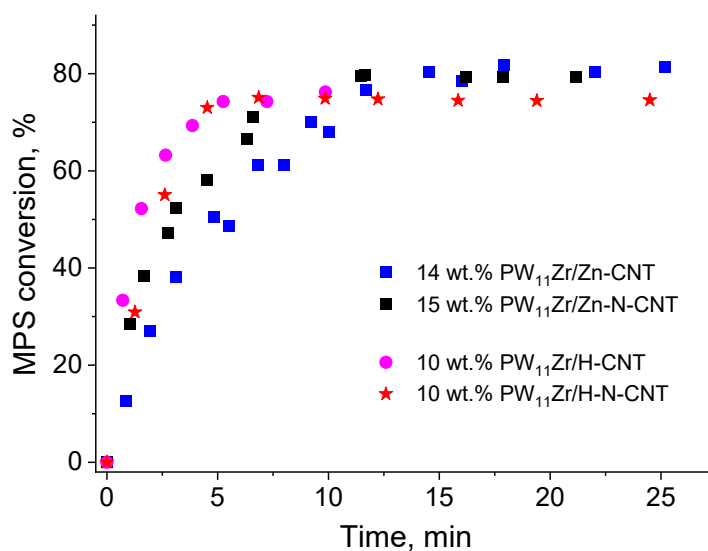

Figure S8. Effects of the support and immobilizing agent nature on the rate of MPS oxidation with 30%  $\text{H}_2\text{O}_2$  over immobilized  $\text{PW}_{11}\text{Zr}$  catalysts. Reaction conditions:  $[\text{MPS}] = 0.1 \text{ M}$ ,  $[\text{H}_2\text{O}_2] = 0.1 \text{ M}$ ,  $0.1 \mu\text{mol Zr-POM}$ ,  $1 \text{ ml CH}_3\text{CN}$ ,  $27 \text{ }^\circ\text{C}$ .

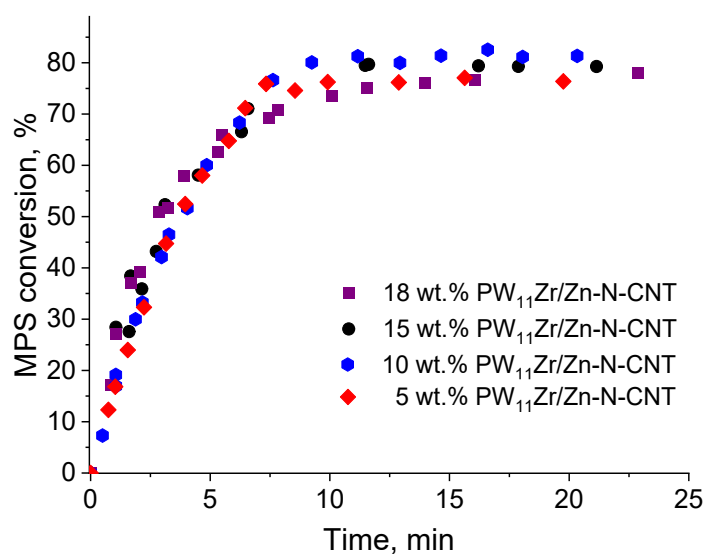

Figure S9. Kinetic curves for MPS oxidation with 30%  $\text{H}_2\text{O}_2$  over  $\text{PW}_{11}\text{Zr/Zn-N-CNT}$  catalysts with varied  $\text{PW}_{11}\text{Zr}$  content. Reaction conditions:  $[\text{MPS}] = 0.1 \text{ M}$ ,  $[\text{H}_2\text{O}_2] = 0.1 \text{ M}$ ,  $0.1 \mu\text{mol Zr-POM}$ ,  $1 \text{ ml CH}_3\text{CN}$ ,  $27 \text{ }^\circ\text{C}$ .

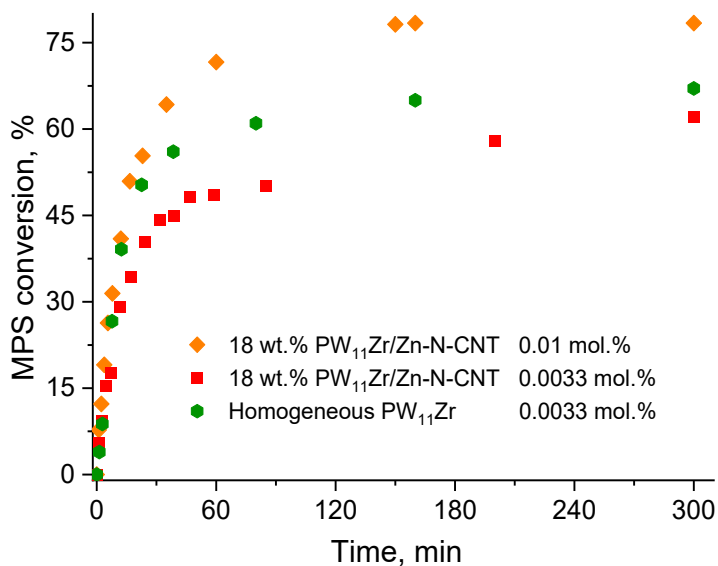

Figure S10. Kinetic curves of MPS oxidation with 30% H<sub>2</sub>O<sub>2</sub> in the presence of 18 wt.% PW<sub>11</sub>Zr/Zn-N-CNT and homogeneous PW<sub>11</sub>Zr. Reaction conditions: [MPS] = 0.1 M, [H<sub>2</sub>O<sub>2</sub>] = 0.1 M, 0.0033 or 0.0094 mol.% Zr-POM, 10 ml CH<sub>3</sub>CN, 27 °C.

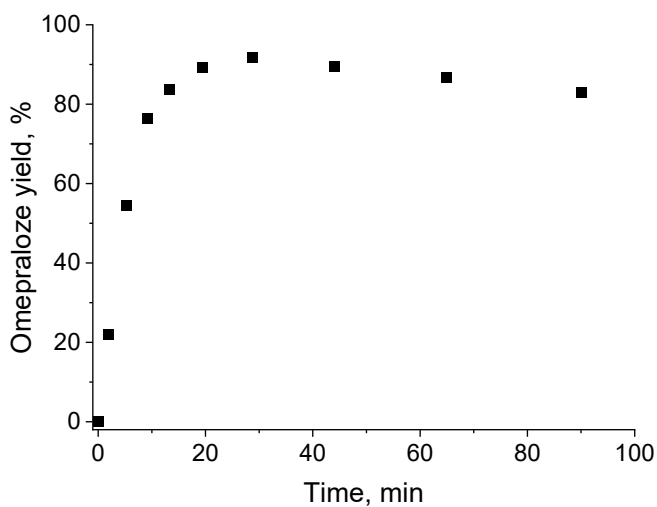

Figure S11. Kinetic curve for omeprazole sulfide oxidation with 30% aqueous H<sub>2</sub>O<sub>2</sub> over 18% PW<sub>11</sub>Zr/N-CNT catalyst. Reaction conditions: [omeprazole sulfide] = 0.05 M, [H<sub>2</sub>O<sub>2</sub>] = 0.05 M, 0.1 μmol Zr-POM, 1 ml CH<sub>3</sub>CN, 27 °C.

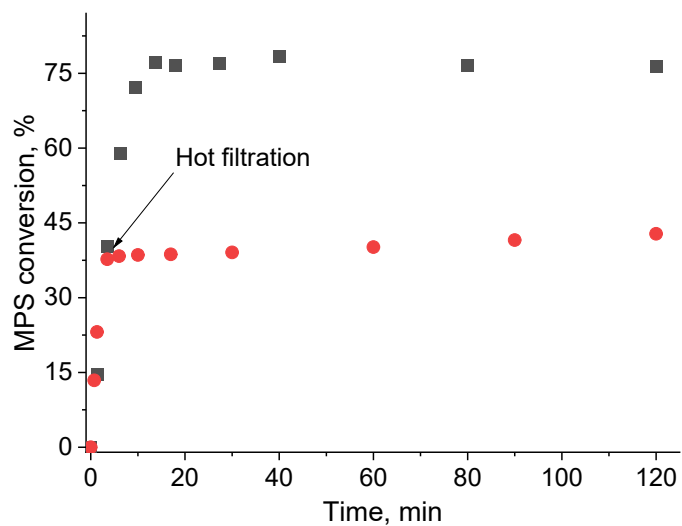

Figure S12. Hot filtration test for MPS oxidation with 30% aq.  $\text{H}_2\text{O}_2$  over 18 wt.%  $\text{PW}_{11}\text{Zr/Zn-N-CNT}$  in ethanol. Reaction conditions:  $[\text{MPS}] = 0.1 \text{ M}$ ,  $[\text{H}_2\text{O}_2] = 0.1 \text{ M}$ ,  $0.05 \mu\text{mol Zr-POM}$ , 1 ml ethanol,  $60 \text{ }^\circ\text{C}$ .

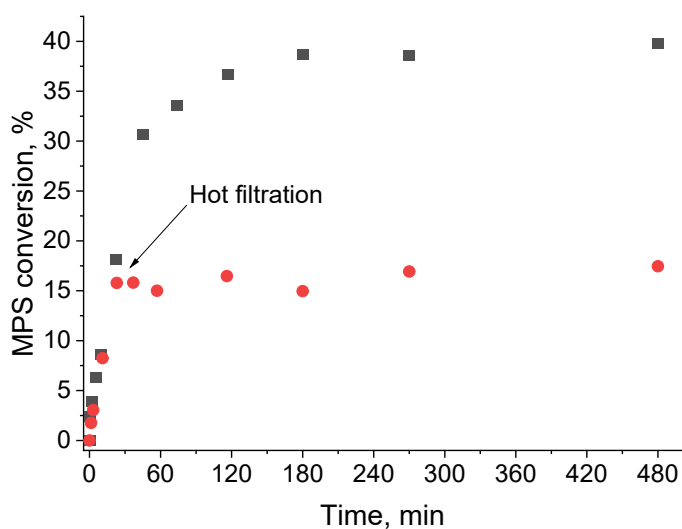

Figure S13. Hot filtration test for MPS oxidation with 30% aq.  $\text{H}_2\text{O}_2$  over 10 wt.%  $\text{P}_2\text{W}_{17}\text{Zr/Zn-N-CNT}$  in ethanol. Reaction conditions:  $[\text{MPS}] = 0.1 \text{ M}$ ,  $[\text{H}_2\text{O}_2] = 0.1 \text{ M}$ ,  $0.1 \mu\text{mol Zr-POM}$ , 1 ml ethanol,  $27 \text{ }^\circ\text{C}$ .

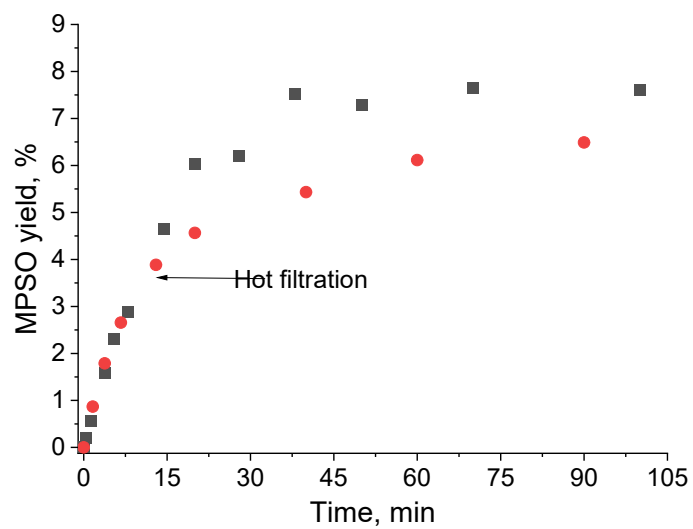

Figure S14. Hot filtration test for MPS oxidation with 30% aq.  $\text{H}_2\text{O}_2$  over 10 wt.%  $\text{PW}_{11}\text{Ti/Zn-N-CNT}$  in ethanol. Reaction conditions:  $[\text{MPS}] = 0.1 \text{ M}$ ,  $[\text{H}_2\text{O}_2] = 0.1 \text{ M}$ ,  $0.1 \mu\text{mol Ti-POM}$ , 1 ml ethanol,  $60 \text{ }^\circ\text{C}$ .

Table S1. Comparison of Zr-POM content in Zr-POM/(N)-CNT based on TGA and UV-vis.

| Catalyst                                   | Amount of Zr-POM based on UV-vis, wt.% | Amount of Zr-POM based on TGA, wt.% |
|--------------------------------------------|----------------------------------------|-------------------------------------|
| ZrW <sub>5</sub> /Zn-N-CNT                 | 13                                     | 16                                  |
| ZrW <sub>5</sub> /Zn-CNT                   | 13                                     | 14                                  |
| ZrW <sub>5</sub> /H-N-CNT                  | 11                                     | 11                                  |
| P <sub>2</sub> W <sub>17</sub> Zr/Zn-N-CNT | 19                                     | 22                                  |
| P <sub>2</sub> W <sub>17</sub> Zr/Zn-CNT   | 12                                     | 12                                  |
| P <sub>2</sub> W <sub>17</sub> Zr/H-N-CNT  | 23                                     | 24                                  |
| PW <sub>11</sub> Zr/Zn-CNT                 | 13                                     | 14                                  |
| PW <sub>11</sub> Zr/Zn-N-CNT               | 18                                     | 20                                  |
| PW <sub>11</sub> Zr/H-N-CNT                | 16                                     | 16                                  |

Table S2. Textural data for CNT and N-CNT supports and representative supported Zr-POM catalysts.

| Catalyst / Support                    | S <sub>BET</sub> , m <sup>2</sup> /g | V <sub>pore</sub> , cm <sup>3</sup> /g |
|---------------------------------------|--------------------------------------|----------------------------------------|
| CNT                                   | 148                                  | 0.70                                   |
| 14 wt.% PW <sub>11</sub> Zr/Zn-CNT    | 119                                  | 0.63                                   |
| 1.8 at.% N-doped CNT                  | 157                                  | 0.61                                   |
| 10 wt.% ZrW <sub>5</sub> /Zn-N-CNT    | 120                                  | 0.54                                   |
| 15 wt.% ZrW <sub>5</sub> /Zn-N-CNT    | 112                                  | 0.50                                   |
| 18 wt.% PW <sub>11</sub> Zr /Zn-N-CNT | 110                                  | 0.47                                   |

Table S3. Elemental composition of TBA-salt PW<sub>11</sub>Zr, N-CNT support and PW<sub>11</sub>Zr/Zn-N-CNT catalyst based on XPS data.

|                                  | C    |      | O    |      | N   |     | Cl   |     | Zr  |     | W   |      | P   |     | Zn  |     |
|----------------------------------|------|------|------|------|-----|-----|------|-----|-----|-----|-----|------|-----|-----|-----|-----|
|                                  | at.  | wt.  | at.  | wt.  | at. | wt. | at.  | wt. | at. | wt. | at. | wt.  | at. | wt. | at. | wt. |
| TBA-salt PW <sub>11</sub> Zr     | 57.9 | 32.5 | 34.4 | 25.7 | 2.3 | 1.5 | -    | -   | 0.6 | 2.6 | 4.3 | 37.0 | 0.5 | 0.7 | -   | -   |
| N-CNT                            | 95.5 | 94.2 | 2.9  | 3.8  | 1.5 | 1.7 | 0.1  | 0.3 | -   | -   | -   | -    | -   | -   | -   | -   |
| 15% PW <sub>11</sub> Zr/Zn-N-CNT | 87.9 | 74.0 | 9.05 | 10.2 | 1.5 | 1.5 | 0.05 | 0.1 | 0.1 | 0.6 | 0.9 | 11.6 | 0.1 | 0.2 | 0.4 | 1.8 |

Table S4. Blank experiments and effect of Zn(NO<sub>3</sub>)<sub>2</sub> additives on catalytic performance.

| No | Catalyst + additive                                                          | Loading, mM/mg  | Time, min | MPS conv., % | MPSO select., % | MPSO <sub>2</sub> select., % |
|----|------------------------------------------------------------------------------|-----------------|-----------|--------------|-----------------|------------------------------|
| 1  | PW <sub>11</sub> Zr                                                          | 1/7.5           | <1        | 80           | 91              | 9                            |
| 2  | PW <sub>11</sub> Zr + Zn(NO <sub>3</sub> ) <sub>2</sub> ,<br>6 equiv. to POM | 1+6/<br>7.5+1.8 | 1         | 75           | 85              | 15                           |
| 3  | PW <sub>11</sub> Zr                                                          | 0.1/0.75        | 3         | 74           | 85              | 13                           |
| 4  | 18% PW <sub>11</sub> Zr/Zn-N-CNT                                             | 0.1/4.2         | 10        | 80           | 88              | 11                           |
| 5  | N-CNT                                                                        | -/5             | 180       | 1            | 0               | 0                            |
| 6  | N-CNT + Zn(NO <sub>3</sub> ) <sub>2</sub> ,<br>10 equiv. to N                | -/5+22          | 180       | 40           | 95              | 4                            |
| 7  | CNT                                                                          | -/5             | 180       | 5            | 95              | 4                            |
| 8  | CNT + of Zn(NO <sub>3</sub> ) <sub>2</sub> , same<br>amount as for N-CNT     | -/5+22          | 180       | 7            | 96              | 3                            |

Reaction conditions: [MPS] = 0.1 M, [H<sub>2</sub>O<sub>2</sub>] = 0.1 M, 1 ml CH<sub>3</sub>CN, 27 °C.

Table S5. Comparison of catalytic performance of various heterogeneous catalysts for selective oxidation of MPS with 30% H<sub>2</sub>O<sub>2</sub>.

| Catalyst                                                                                         | [MPS], M          | [H <sub>2</sub> O <sub>2</sub> ], M | Catalyst, mol. % <sup>a</sup> | T, °C | Solvent                                                | Time, min | MPS conv., % | Selectivity, % |                   | H <sub>2</sub> O <sub>2</sub> eff., % | TON <sup>b</sup> | TOF, h <sup>-1</sup> <sup>c</sup> | Heterogen. nature of catalysis <sup>d</sup> | Ref.      |
|--------------------------------------------------------------------------------------------------|-------------------|-------------------------------------|-------------------------------|-------|--------------------------------------------------------|-----------|--------------|----------------|-------------------|---------------------------------------|------------------|-----------------------------------|---------------------------------------------|-----------|
|                                                                                                  |                   |                                     |                               |       |                                                        |           |              | MPSO           | MPSO <sub>2</sub> |                                       |                  |                                   |                                             |           |
| PW <sub>11</sub> Zr/Zn-N-CNT                                                                     | 0.1               | 0.1                                 | 0.1                           | 27    | CH <sub>3</sub> CN                                     | 10        | 80           | 88             | 12                | 90                                    | 880              | 10200                             | +                                           | This work |
| PW <sub>11</sub> Zr/Zn-N-CNT                                                                     | 0.1               | 0.1                                 | 0.01                          | 27    | CH <sub>3</sub> CN                                     | 130       | 78           | 87             | 12                | 84                                    | 9360             | n.d.                              | +                                           | This work |
| UiO-66                                                                                           | 0.1               | 0.1                                 | 4                             | 25    | CH <sub>3</sub> CN                                     | 15        | 48           | 1              | 99                | 96                                    | 24               | 180                               | +                                           | [S9]      |
| Zr-MMM-E                                                                                         | 0.1               | 0.1                                 | 1.3                           | 60    | CH <sub>3</sub> CN                                     | 60        | 57           | 37             | 63                | 93                                    | 71               | 130                               | +                                           | [S10]     |
| PW <sub>4</sub> /CNT                                                                             | 0.1               | 0.1                                 | 1                             | 27    | CH <sub>3</sub> CN                                     | 150       | 93           | 90             | 10                | 99                                    | 99               | 106                               | +                                           | [S11]     |
| PW <sub>4</sub> -PIILP                                                                           | 0.33              | 0.83                                | 0.5                           | 45    | CH <sub>3</sub> OH                                     | 15        | 95           | 96             | 4                 | n.d.                                  | 200              | 760                               | +                                           | [S12]     |
| PW <sub>4</sub> -Zn/SnO <sub>2</sub>                                                             | 0.1               | 0.1 <sup>h</sup>                    | 0.7                           | 20    | DMC                                                    | 7         | 87           | 84             | 16                | 99                                    | 143              | n.d.                              | +                                           | [S13]     |
| WO <sub>3</sub> -Zn/SnO <sub>2</sub>                                                             | 0.1               | 0.1 <sup>h</sup>                    | 0.5                           | 20    | DMC                                                    | 90        | 84           | 81             | 19                | 99                                    | 200              | n.d.                              | +                                           | [S14]     |
| W-MMM-E                                                                                          | 0.1               | 0.1                                 | 1                             | 25    | CH <sub>3</sub> CN                                     | 300       | 91           | 91             | 9                 | 99                                    | 106              | 120                               | +                                           | [S15]     |
| [W <sub>10</sub> O <sub>32</sub> ] <sup>4+</sup> /SiO <sub>2</sub> -NH <sub>3</sub> <sup>+</sup> | 0.2               | 0.23                                | 0.1                           | 25    | CH <sub>3</sub> OH/<br>CH <sub>2</sub> Cl <sub>2</sub> | 90        | 97           | 95             | 5                 | 98                                    | 960              | n.d.                              | +                                           | [S16]     |
| [VO <sub>2</sub> (sal-ambmz)]-Y                                                                  | 0.25              | 0.25                                | 0.036                         | 25    | CH <sub>3</sub> CN                                     | 120       | 96           | 97             | 3                 | 98                                    | 2750             | 1345                              | +                                           | [S17]     |
| [C <sub>4</sub> mim] <sub>3</sub> [PMo <sub>12</sub> O <sub>40</sub> ]                           | 0.1               | 0.11                                | 2                             | 25    | CH <sub>3</sub> OH                                     | 30        | 99           | 98             | 2                 | 91                                    | 50               | n.d.                              | n.d.                                        | [S18]     |
| [MoO <sub>2</sub> (O <sub>2</sub> )(L) <sub>2</sub> ] <sup>2-</sup> -MRA                         | 1                 | 2                                   | 0.1                           | 25    | CH <sub>3</sub> OH                                     | 40        | >99          | >99            | <1                | n.d.                                  | 980              | 1470                              | +                                           | [S19]     |
| Polymerized ionic network (PIN) viologen                                                         | 0.25              | 0.5                                 | 7.8 <sup>e</sup>              | 60    | CH <sub>3</sub> OH                                     | 70        | 99           | 97             | 3                 | n.d.                                  | 13               | n.d.                              | +                                           | [S20]     |
| TS-1-Lam                                                                                         | 0.4               | 0.2                                 | 0.45                          | 25    | CH <sub>3</sub> CN                                     | 120       | 50           | 99             | 1                 | n.d.                                  | 118              | 324                               | n.d.                                        | [S21]     |
| TS-1                                                                                             | 8.3 <sup>f</sup>  | 11.6                                | 0.2                           | 25    | no solv.                                               | 120       | 65           | 81             | 12                | n.d.                                  | 230              | n.d.                              | +                                           | [S22]     |
| Ti-IEZ-MMW                                                                                       | 8.3 <sup>f</sup>  | 11.6                                | 0.2                           | 25    | no solv.                                               | 120       | 99           | 94             | 6                 | 99                                    | 490              | n.d.                              | +                                           | [S21]     |
| Ti-MMM-2                                                                                         | 0.1               | 0.12                                | 1.6                           | 20    | CH <sub>3</sub> CN                                     | 35        | 98           | 76             | 24                | n.d.                                  | 74               | 100                               | +                                           | [S23]     |
| Ti-Beta                                                                                          | 0.1               | 0.3                                 | 2                             | 40    | CH <sub>3</sub> CN                                     | 30        | 93           | 65             | 35                | n.d.                                  | 62               | n.d.                              | n.d.                                        | [S24]     |
| Ti-MCM-41                                                                                        | 0.1               | 0.3                                 | 1.3                           | 40    | CH <sub>3</sub> CN                                     | 30        | 80           | 75             | 25                | n.d.                                  | 77               | n.d.                              | n.d.                                        | [S23]     |
| Ti-FER-12.5 Dark                                                                                 | 0.02 <sup>f</sup> | 0.1                                 | 5                             | 25    | CH <sub>3</sub> CN                                     | 250       | 80           | 95             | 5                 | >95                                   | 17               | 14                                | n.d.                                        | [S25]     |

<sup>a</sup> Catalyst mol.% was determined as the ratio of moles of substrate per moles of active sites under the assumption that all metal (active compound) sites are accessible for reactants; <sup>b</sup>TON (turnover number) = (moles of MPSO + 2 × moles MPSO<sub>2</sub> generated) / moles of catalyst; <sup>c</sup>TOF (turnover frequency) = moles of substrate consumed / (moles of catalyst × time), determined from initial rates of substrate consumption or taken from reported data; n.d. – not determined (no kinetic data were provided); <sup>d</sup>“+” – proved by hot filtration test, n.d. – the nature of catalysis was not determined; <sup>e</sup>calculated under the assumption that each viologen residue is a catalytically active site; <sup>f</sup>1 mmol of neat MPS was used and 1.2 mmol of 35% H<sub>2</sub>O<sub>2</sub>, [MPS] = 8.3 M and [H<sub>2</sub>O<sub>2</sub>] = 11.6 M; <sup>g</sup>Diphenyl sulfide was used as a substrate, <sup>h</sup>60% H<sub>2</sub>O<sub>2</sub> was used.

## References

- [S1] R. Villanneau, H. Carabineiro, X. Carrier, R. Thouvenot, P. Herson, F. Lemos, F. Ramoa Ribeiro, M. Che, Synthesis and characterization of Zr (IV) polyoxotungstates as molecular analogues of zirconia-supported tungsten catalysts, *J. Phys. Chem. B*, 2004, **108**, 12465–12471.
- [S2] K. Nomiya, Y. Saku, S. Yamada, W. Takahashi, H. Sekiya, A. Shinohara, M. Ishimaru, Y. Sakai, Synthesis and Structure of Dinuclear Hafnium(IV) and Zirconium(IV) Complexes Sandwiched between 2 Mono-Lacunary  $\alpha$ -Keggin Polyoxometalates, *Dalton Trans.*, 2009, 5504.
- [S3] N. V. Maksimchuk, S. M. Marikovskaya, K. P. Larionov, A. A. Antonov, M. V. Shashkov, V. V. Yanshole, V. Yu. Evtushok, O. A. Kholdeeva, Tuning Reactivity of Zr-Substituted Keggin Phosphotungstate in Alkene Epoxidation through Balancing H<sub>2</sub>O<sub>2</sub> Activation Pathways: Unusual Effect of Base, *Inorg. Chem.*, 2023, **62**, 18955–18969.
- [S4] O. A. Kholdeeva, G. M. Maksimov, R. I. Maksimovskaya, M. P. Vanina, T. A. Trubitsina, D. Yu. Naumov, B. A. Kolesov, N. S. Antonova, J. J. Carbó, J. M. Poblet, Zr(IV)-Monosubstituted Keggin-Type Dimeric Polyoxometalates: Synthesis, Characterization, Catalysis of H<sub>2</sub>O<sub>2</sub>-based Oxidations, and Theoretical Study, *Inorg. Chem.*, 2006, **45**, 7224–7234.
- [S5] Y. Saku, Y. Sakai, K. Nomiya, Relation Among the 2:2-, 1:1- and 1:2-type Complexes of Hafnium(IV)/Zirconium(IV) with Mono-Lacunary  $\alpha_2$ -Dawson Polyoxometalate Ligands: Synthesis and Structure of the 2:2-Type Complexes [ $\{\alpha_2\text{-P}_2\text{W}_{17}\text{O}_{61}\text{M}(\mu\text{-OH})(\text{H}_2\text{O})\}_2$ ]<sup>14-</sup> (M=Hf, Zr), *Inorg. Chim. Acta* 2010, **363**, 967–974.
- [S6] W. G. Klemperer, *Introduction to Early Transition Metal Polyoxoanions* in *Inorg. Synth.*, A. P. Ginsberg (Ed.), 1990; Vol. 27, pp 71–132.
- [S7] O.A. Kholdeeva, G.M. Maksimov, R.I. Maksimovskaya, L.A. Kovaleva, M.A. Fedotov, V.A. Grigoriev, C.L. Hill, A Dimeric Titanium-Containing Polyoxometalate. Synthesis, Characterization, and Catalysis of H<sub>2</sub>O<sub>2</sub>-Based Thioether Oxidation, *Inorg. Chem.*, 2000, **39**, 3828–3837.
- [S8] R.J. Errington, B. Kandasamy, D. Lebbie, T. Izuagie, in *Polyoxometalate-Based Assemblies and*



---

*Functional Materials. Structure and Bonding*; (Ed.: Y.F. Song); Springer: Cham, 2017, Vol. 176, pp 139–163.

[S9] V. Y. Evtushok, K. P. Larionov, V. A. Lopatkin, O. A. Stonkus, O. A. Kholdeeva, What factors determine activity of UiO-66 in H<sub>2</sub>O<sub>2</sub>-based oxidation of thioethers? The role of basic sites, *J. Catal.*, 2023, **427**, 115099.

[S10] I. D. Ivanchikova, O. V. Zalomaeva, N. V. Maksimchuk, O. A. Stonkus, T. S. Glazneva, Y. A. Chesalov, A. N. Shmakov, M. Guidotti, O. A. Kholdeeva, Alkene Epoxidation and Thioether Oxidation with Hydrogen Peroxide Catalyzed by Mesoporous Zirconium-Silicates, *Catalysts*, 2022, **12**, 742.

[S11] V. Y. Evtushok, I. D. Ivanchikova, O. Y. Podyacheva, O. A. Stonkus, A. N. Suboch, A. Y. Chesalov, O. V. Zalomaeva, O. A. Kholdeeva, Carbon nanotubes modified by Venturello complex as highly efficient catalysts for alkene and thioethers oxidation with hydrogen peroxide, *Front. Chem.*, 2019, **7**, 858.

[S12] S. Doherty, J. G. Knight, M. A. Carroll, J. R. Ellison, S. J. Hobson, S. Stevens, C. Hardacre and P. Goodrich, Efficient and selective hydrogen peroxide-mediated oxidation of sulfides in batch and segmented and continuous flow using a peroxometalate-based polymer immobilised ionic liquid phase catalyst, *Green Chem.*, 2015, **17**, 1559-1571.

[S13] S. Nojima, K. Kamata, K. Suzuki, K. Yamaguchi, N. Mizuno, Selective Oxidation with Aqueous Hydrogen Peroxide by [PO<sub>4</sub>{WO(O<sub>2</sub>)<sub>2</sub>}<sub>4</sub>]<sup>3-</sup> Supported on Zinc-Modified Tin Dioxide, *ChemCatChem*, 2015, **7**, 1097-1104.

[S14] K. Kamata, K. Yonehara, Y. Sumida, K. Hirata, S. Nojima, N. Mizuno. Efficient heterogeneous epoxidation of alkenes by a supported tungsten oxide catalyst, *Angew. Chem. Int. Ed.*, 2011, **50**, 12062-12066.

[S15] N. Maksimchuk, I. Ivanchikova, O. Zalomaeva, Y. Chesalov, A. Shmakov, V. Zaikovskii, O. Kholdeeva, Tungsten-based mesoporous silicates W-MMM-E as heterogeneous catalysts for liquid-phase oxidations with aqueous H<sub>2</sub>O<sub>2</sub>, *Catalysts*, 2018, **8**, 95.

[S16] F. Bigi, A. Corradini, C. Quarantelli, G. Sartori, Silica-bound decatungstates as heterogeneous catalysts for H<sub>2</sub>O<sub>2</sub> activation in selective sulfide oxidation, *J. Catal.*, 2007, **250**, 222-230.

- 
- [S17] M. R. Maurya, A. K. Chandrakar, S. Chand, Oxidation of phenol, styrene and methyl phenyl sulfide with H<sub>2</sub>O<sub>2</sub> catalysed by dioxovanadium(V) and copper(II) complexes of 2-aminomethylbenzimidazole-based ligand encapsulated in zeolite-Y, *J. Mol. Catal. A: Chem.*, 2007, **263**, 227-237.
- [S18] P. Zhao, M. Zhang, Y. Wu, J. Wang, Heterogeneous Selective Oxidation of Sulfides with H<sub>2</sub>O<sub>2</sub> Catalyzed by Ionic Liquid-Based Polyoxometalate Salts, *Ind. Eng. Chem. Res.*, 2012, **51**, 6641-6647.
- [S19] J. J. Boruah, S. P. Das, S. R. Ankireddy, S. R. Gogoi, N. S. Islam, Merrifield resin supported peroxomolybdenum(vi) compounds: recoverable heterogeneous catalysts for the efficient, selective and mild oxidation of organic sulfides with H<sub>2</sub>O<sub>2</sub>, *Green Chem.*, 2013, **15**, 2944-2959.
- [S20] S. Hou, N. Chen, P. Zhang, S. Dai, Heterogeneous viologen catalysts for metal-free and selective oxidations, *Green Chem.*, 2019, **21**, 1455-1460.
- [S21] I. Martausová, D. Spustová, D. Cvejn, A. Martaus, Z. Lacný, J. Přeč, Catalytic activity of advanced titanosilicate zeolites in hydrogen peroxide S-oxidation of methyl(phenyl)sulfide, *Catal. Today*, 2019, **324**, 144-153.
- [S22] Y. Kon, T. Yokoi, M. Yoshioka, S. Tanaka, Y. Uesaka, T. Mochizuki, K. Sato, T. Tatsumi, Selective hydrogen peroxide oxidation of sulfides to sulfoxides or sulfones with MWW-type titanosilicate zeolite catalyst under organic solvent-free conditions, *Tetrahedron*, 2014, **70**, 7584-7592.
- [S23] O. A. Kholdeeva, M. S. Mel'gunov, A. N. Shmakov, N. N. Trukhan, V. V. Kriventsov, V. I. Zaikovskii, M. E. Malyshev, V. N. Romannikov, A new mesoporous titanium-silicate Ti-MMM-2: a highly active and hydrothermally stable catalyst for H<sub>2</sub>O<sub>2</sub>-based selective oxidations, *Catal. Today*, 2004, **91**, 205-209.
- [S24] A. Corma, M. Iglesias, F. Sanchez, Large pore Ti-zeolites and mesoporous Ti-silicalites as catalysts for selective oxidation of organic sulfides, *Catal. Lett.*, 1996, **39**, 153-156.
- [S25] M. Radko, M. Rutkowska, A. Kowalczyk, P. Mikrut, A. Świąć, U. Díaz, A. E. Palomares, W. Macyk, L. Chmielarz, Catalytic oxidation of organic sulfides by H<sub>2</sub>O<sub>2</sub> in the presence of titanosilicate zeolites, *Micropor. Mesopor. Mater.*, 2020, **302**, 110219.
